# Supplementary material
Source: PubMed Central journal article supplement (PMC2154457)
Supplement: supp_0608364104_08364Fig10.pdf [file supp_0608364104_08364Fig10.pdf]

A

| Ratio<br>(Spliced GLTs)       | $\frac{\text{native } \gamma 1 \text{ at 5 ng/ml}}{\text{chimeric } \gamma 3 \text{ at 5 ng/ml}}$ |        | $\frac{\text{native } \gamma 1 \text{ at 25 ng/ml}}{\text{chimeric } \gamma 3 \text{ at 25 ng/ml}}$ |        |
|-------------------------------|---------------------------------------------------------------------------------------------------|--------|-----------------------------------------------------------------------------------------------------|--------|
|                               | Exp. 1                                                                                            | Exp. 2 | Exp. 1                                                                                              | Exp. 2 |
| 3'l $\gamma$ 1-C $\gamma$ 3/1 | 10.5                                                                                              | 11.7   | 4.7                                                                                                 | 5.28   |

| Ratio<br>(Spliced GLTs) | $\frac{\text{wt at 25 ng/ml}}{\text{wt at 5 ng/ml}}$ |        | $\frac{\text{l}\gamma 1/\text{l}\gamma 3 \text{ at 25 ng/ml}}{\text{l}\gamma 1/\text{l}\gamma 3 \text{ at 5 ng/ml}}$ |        | $\frac{\text{l}\gamma 1/\text{l}\gamma 3 \text{ at 5 ng/ml}}{\text{wt at 5 ng/ml}}$ |        | $\frac{\text{l}\gamma 1/\text{l}\gamma 3 \text{ at 25 ng/ml}}{\text{wt at 25 ng/ml}}$ |        |
|-------------------------|------------------------------------------------------|--------|----------------------------------------------------------------------------------------------------------------------|--------|-------------------------------------------------------------------------------------|--------|---------------------------------------------------------------------------------------|--------|
|                         | Exp. 1                                               | Exp. 2 | Exp. 1                                                                                                               | Exp. 2 | Exp. 1                                                                              | Exp. 2 | Exp. 1                                                                                | Exp. 2 |
| Native $\gamma 1$       | 2.79                                                 | 2.54   | 2.57                                                                                                                 | 2.98   | 0.85                                                                                | 0.94   | 1.04                                                                                  | 0.99   |
| Actin                   | 1.1                                                  | 1.15   | 0.93                                                                                                                 | 0.94   | 1.16                                                                                | 1.05   | 0.92                                                                                  | 1.03   |

B

| Ratio<br>(Unspliced GLTs)             | $\frac{\text{wt at 25 ng/ml}}{\text{wt at 5 ng/ml}}$ |        | $\frac{\text{l}\gamma 1/\text{l}\gamma 3 \text{ at 25 ng/ml}}{\text{l}\gamma 1/\text{l}\gamma 3 \text{ at 5 ng/ml}}$ |        | $\frac{\text{l}\gamma 1/\text{l}\gamma 3 \text{ at 5 ng/ml}}{\text{wt at 5 ng/ml}}$ |        | $\frac{\text{l}\gamma 1/\text{l}\gamma 3 \text{ at 25 ng/ml}}{\text{wt at 25 ng/ml}}$ |        |
|---------------------------------------|------------------------------------------------------|--------|----------------------------------------------------------------------------------------------------------------------|--------|-------------------------------------------------------------------------------------|--------|---------------------------------------------------------------------------------------|--------|
|                                       | Exp. 1                                               | Exp. 2 | Exp. 1                                                                                                               | Exp. 2 | Exp. 1                                                                              | Exp. 2 | Exp. 1                                                                                | Exp. 2 |
| $\gamma 1\text{-}1/\gamma 1\text{-}3$ | 2.70                                                 | 3.9    | 2.37                                                                                                                 | 2.39   | 1.40                                                                                | 1.47   | 0.93                                                                                  | 1.23   |
| $\gamma 3\text{-}1/\gamma 3\text{-}3$ | 1.28                                                 | 0.9    | 1.42                                                                                                                 | 1.53   | 67.21                                                                               | 70.9   | 69.5                                                                                  | 84.29  |
| Actin                                 | 1.36                                                 | 1.1    | 1.3                                                                                                                  | 0.89   | 1.19                                                                                | 1.0    | 0.96                                                                                  | 1.3    |

C

| Ratio<br>(Unspliced GLTs)             | $\frac{\text{wt}}{\text{l}\gamma 1/\text{l}\gamma 3}$ |        |
|---------------------------------------|-------------------------------------------------------|--------|
|                                       | Exp. 1                                                | Exp. 2 |
| $\gamma 1\text{-}1/\gamma 1\text{-}3$ | 0.91                                                  | 0.94   |
| $\gamma 3\text{-}1/\gamma 3\text{-}3$ | 37.28                                                 | 41.2   |
| Actin                                 | 1.36                                                  | 1.01   |
