# Supplementary material
Source: PubMed Central journal article supplement (PMC2154457)
Supplement: supp_0608364104_08364Scheme1.pdf [file supp_0608364104_08364Scheme1.pdf]

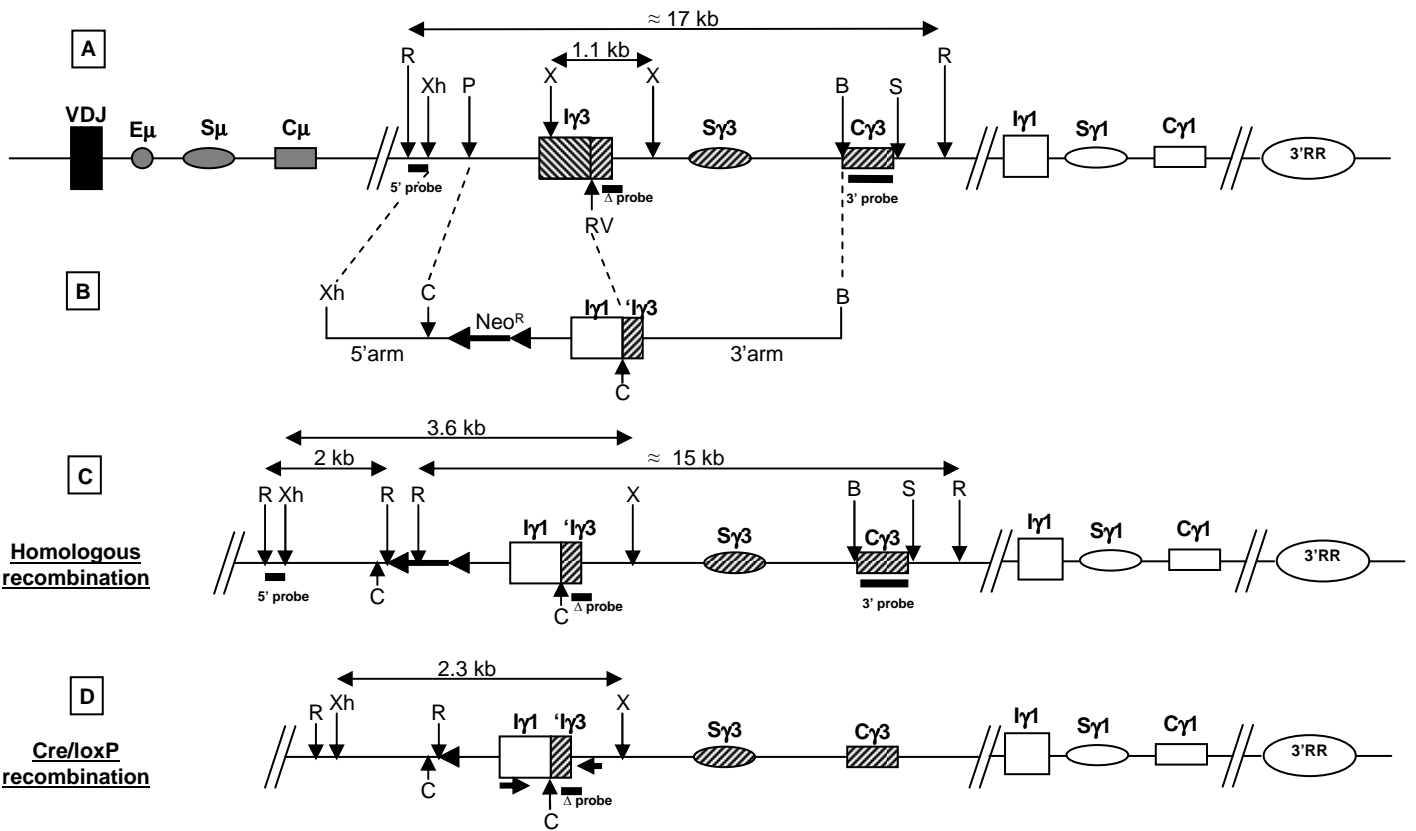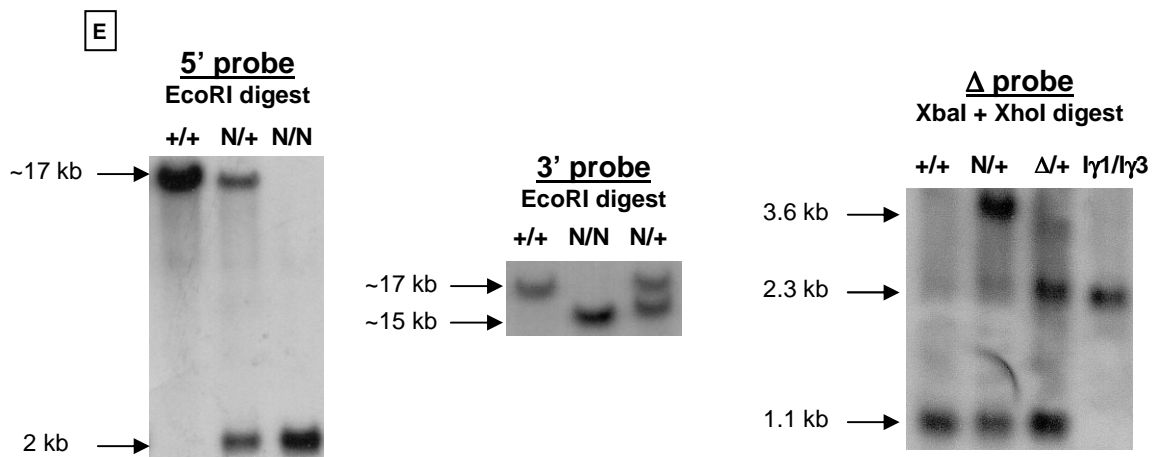

**F**

**ZOy1-2 primer**

GGACTCTGTACTCTGTTCACAGCCCTCAGCCTCTGTGCCTCAGGCGAATCCGGGTTTTCTTGAGATAGCACCAAC  
AAGATACAGGTAAAGGGAGATATAGCCTCCAAAGCTGGACTTACTTAGATCAGCCATGAATGAGAGACCCAGTT  
CCTATGAAACCTCTCCAATGAGGTGGTCAGGAAAGAGTGGGCATAATCACTCAGCCTCAACCAGCCCAGGGACC  
CCCAAAGGCCAGGTGCACAGAGAAACAGGAGTACAGCCAGGCTTCCTACCTTCTCCCCTGAGTCTCAAGGGTA

STAT6 site

CCGCCTCACCTCACCCACACATTCACATGAAGTAATCTAAGTCAGGTTTGGACTCCCCTCACCCTCTGACAC

C/EBP

κB1 site

AGAAACCCCCAGAATGAAGGGGAACCTGTCAGGAAATGCCTTATGCCACCCACTGTCAATCCTGTTCTTAatc

κB2 site

κB3 site

gatccATCAGCAAAACAGAACAACCAACAACCCATGGAAGAGTGGGAAGAAGTCGAAATACCAGACTGTGGAGG  
GGGTCTCTCTGATGCACAGGTAAGGTGATGGCCTGAAGAATGTCATCCAGACAGGGTCCAAGGATGCCACAGGC  
TGGAACATGGGCAAGTGGATCTGAACACACACAACAAAAACAACAATACTGCTACCACCACCAGAGTCAG  
CCTCAAGGAGATGATGGGATATATCAGGATACCTAAGATAAGATGAACTTGGTCTGTCTGGAAGCTGGCAGGAC  
CAAATTCGCTGAGTCATCAGAGAAGAGGTGGCCAGAGGAGCAAGATCTCTGCAGCAGAAATCTGCAGGACTAAC  
AAAGgtgagtttatagaggaaagtaggcatggaggaatacaaaagttcatctaagagggactctaggcctgctgg  
ggaagccaagagtgtggaactctaaggtttaggagtcaatctcagtgctgaagagacaagatgaggggctgagc  
togaagccaagacgggcaggaagaagtataggaaactcctaggatcaggtgggacagctccaggtgagctgtgg  
aggc

γ3-4 primer
