# Supplementary material
Source: PubMed Central journal article supplement (PMC2154457)

SI Figure 6A

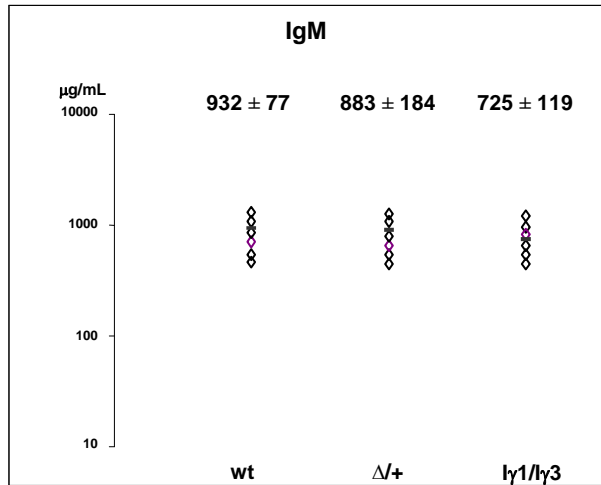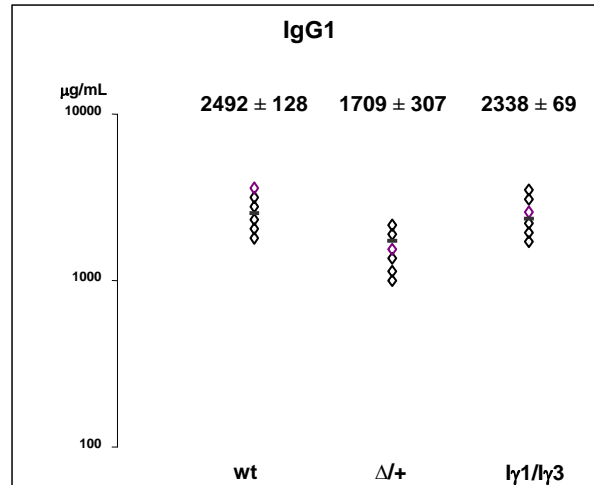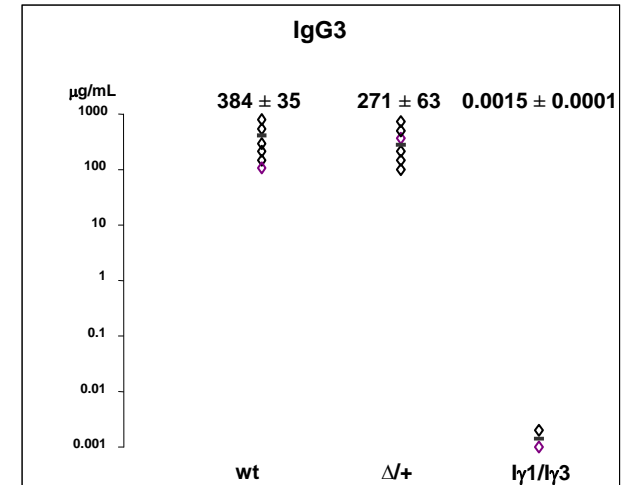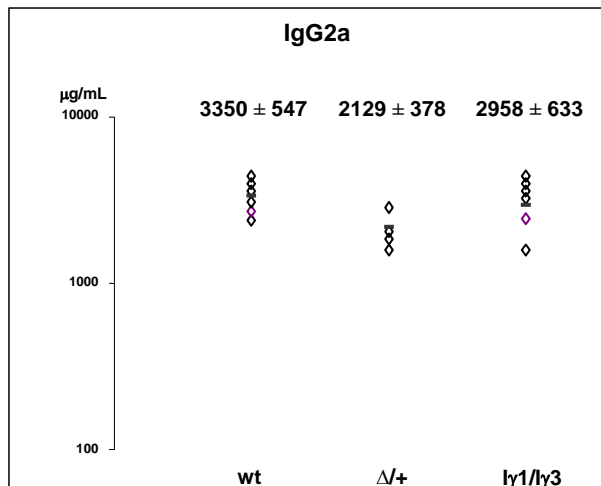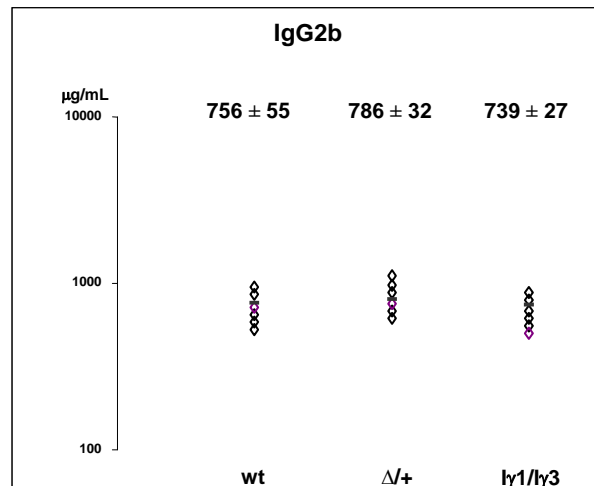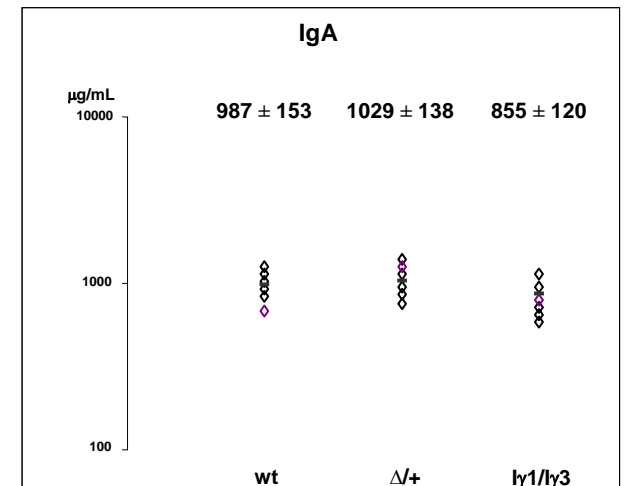

SI Figure 6B

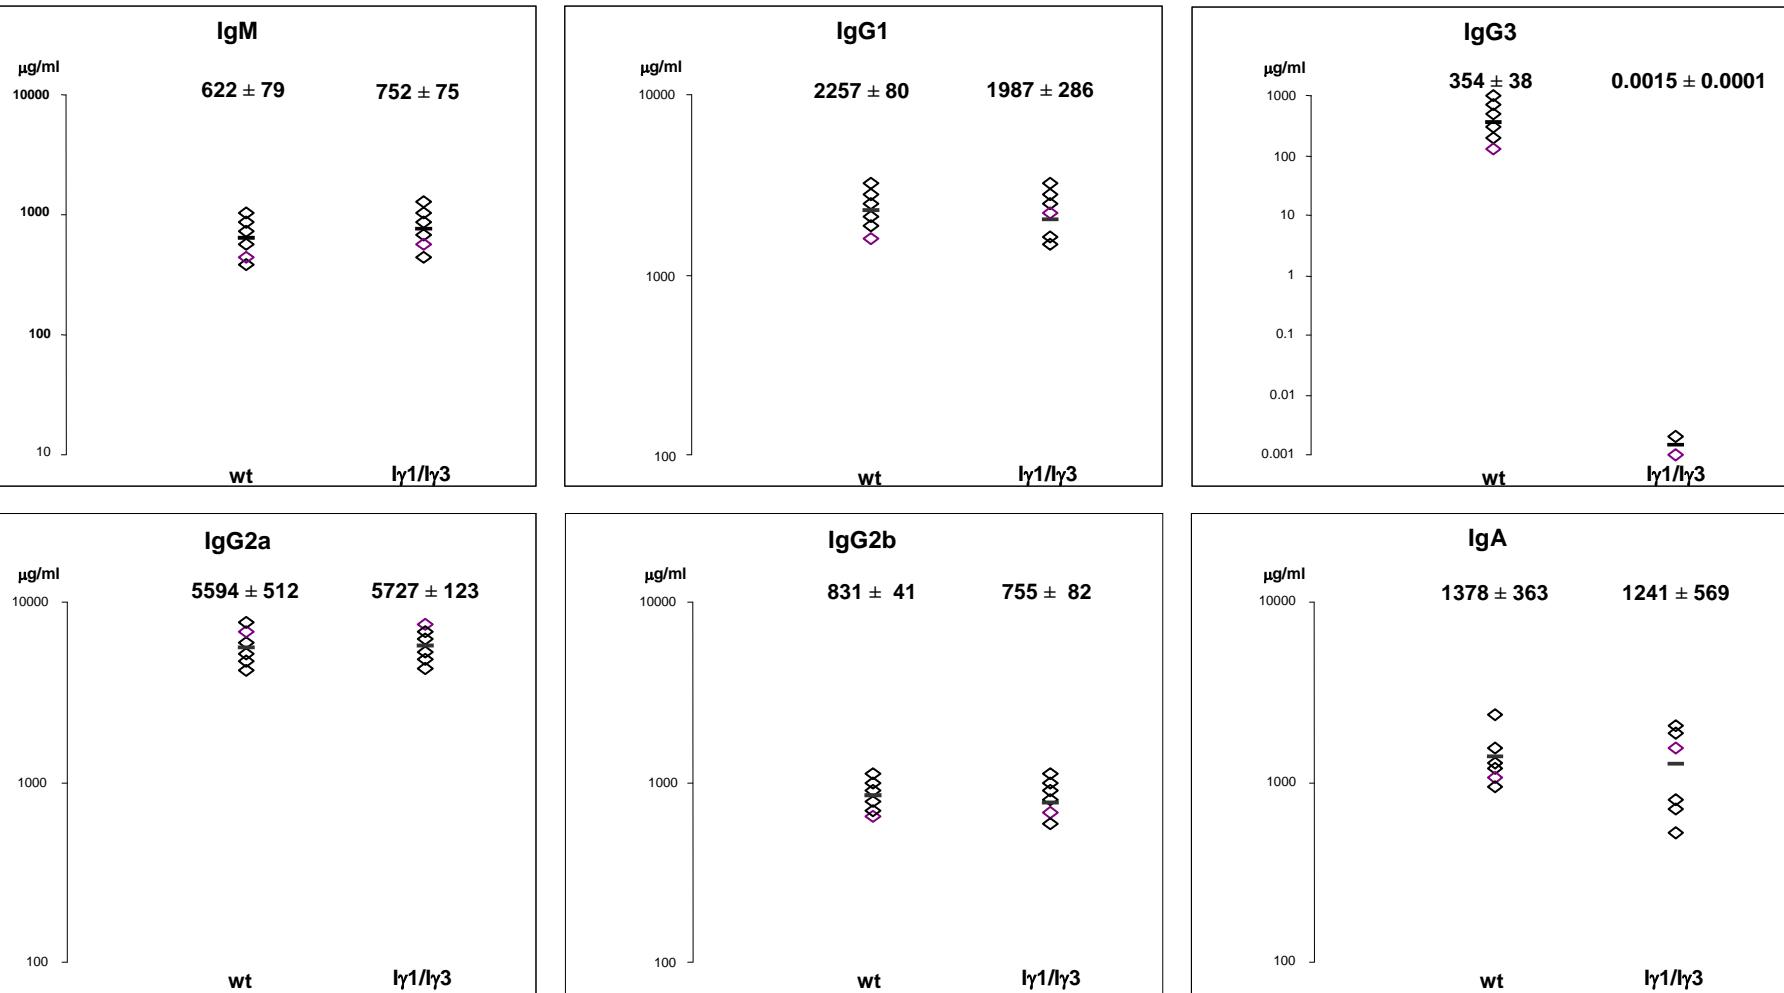

Supplement: supp_0608364104_08364Fig6.pdf [file supp_0608364104_08364Fig6.pdf]

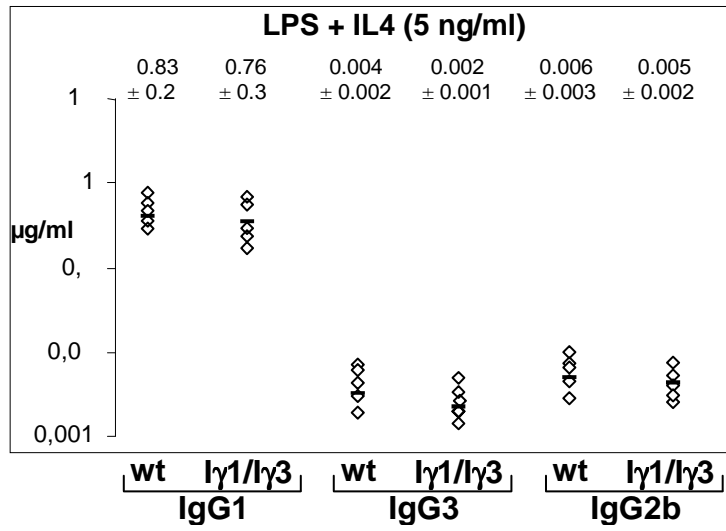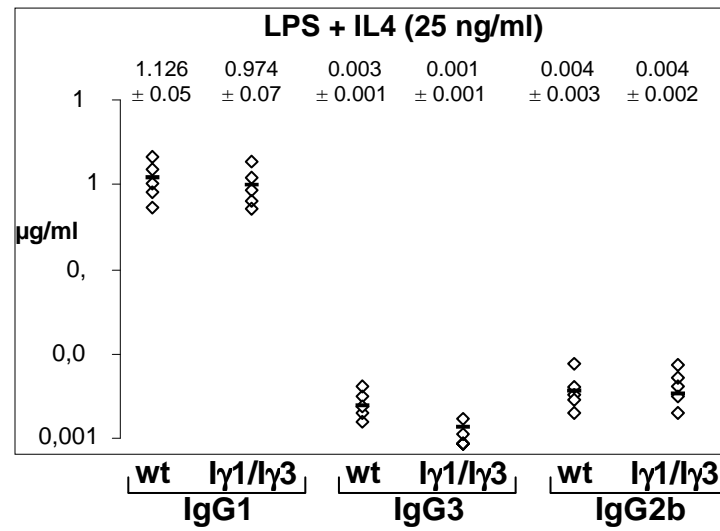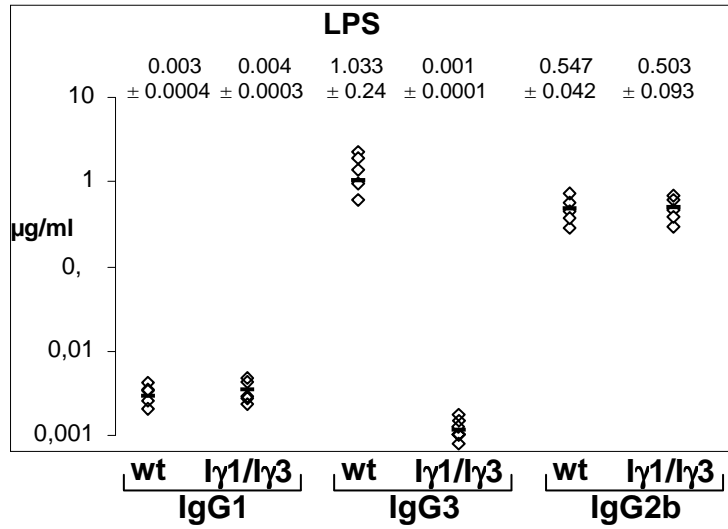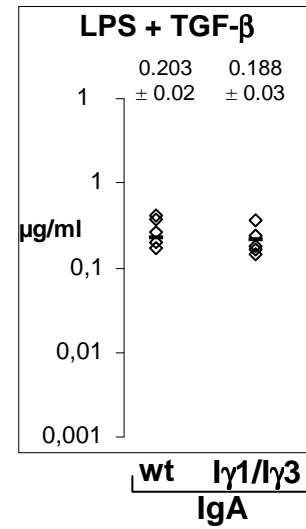

Supplement: supp_0608364104_08364Fig7.pdf [file supp_0608364104_08364Fig7.pdf]

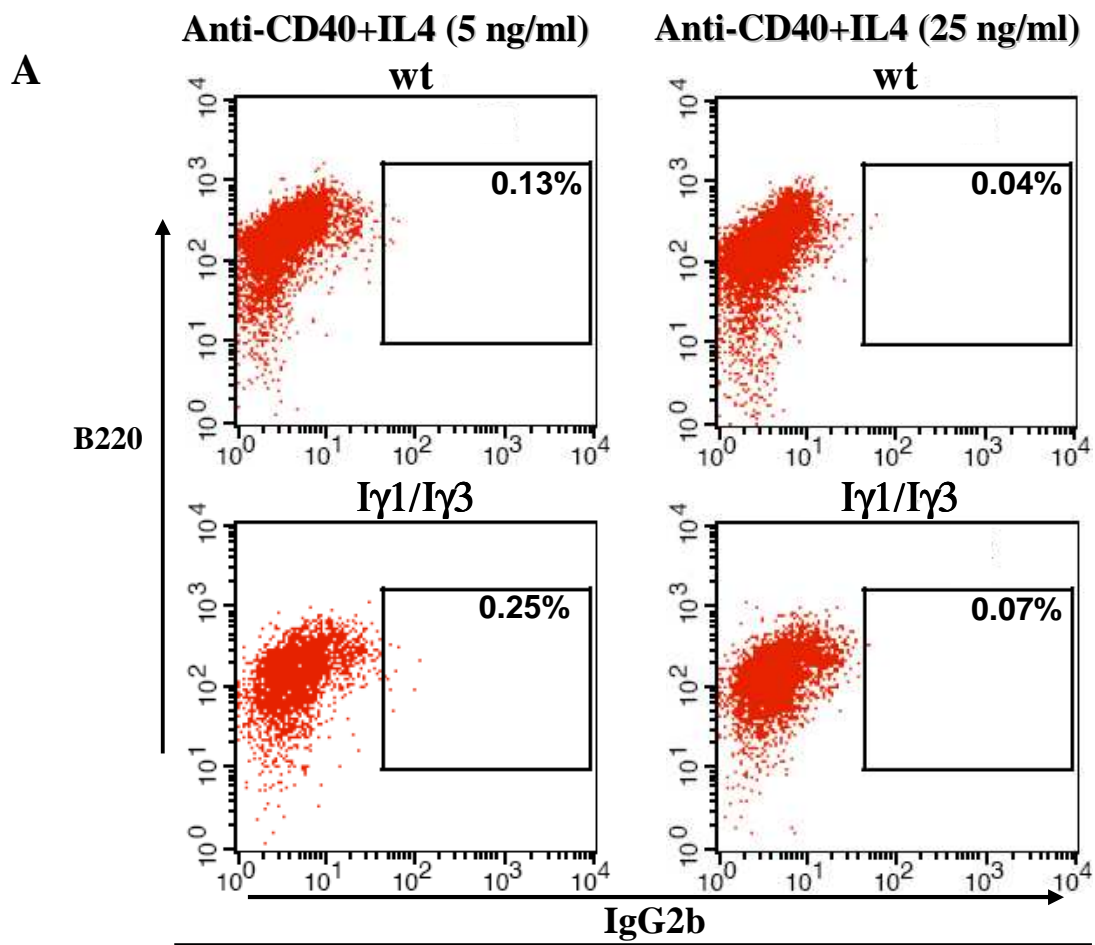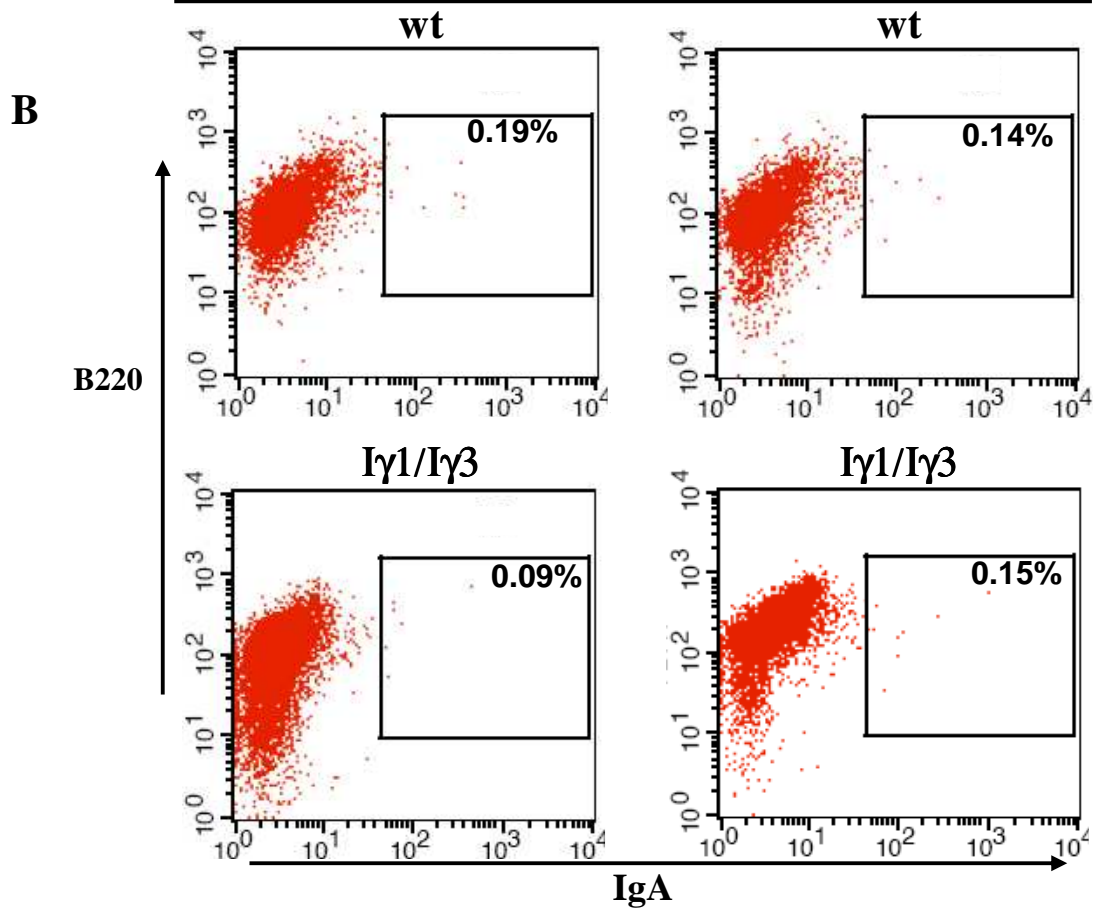

**C**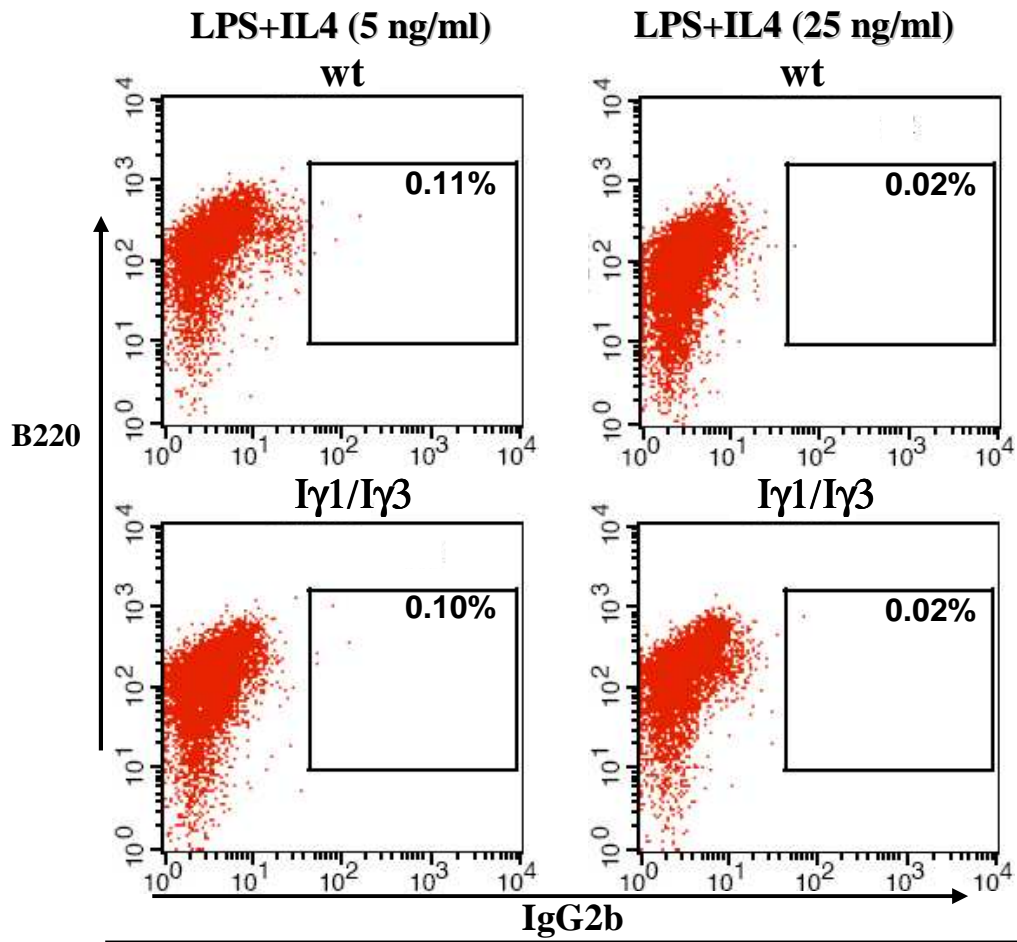**D**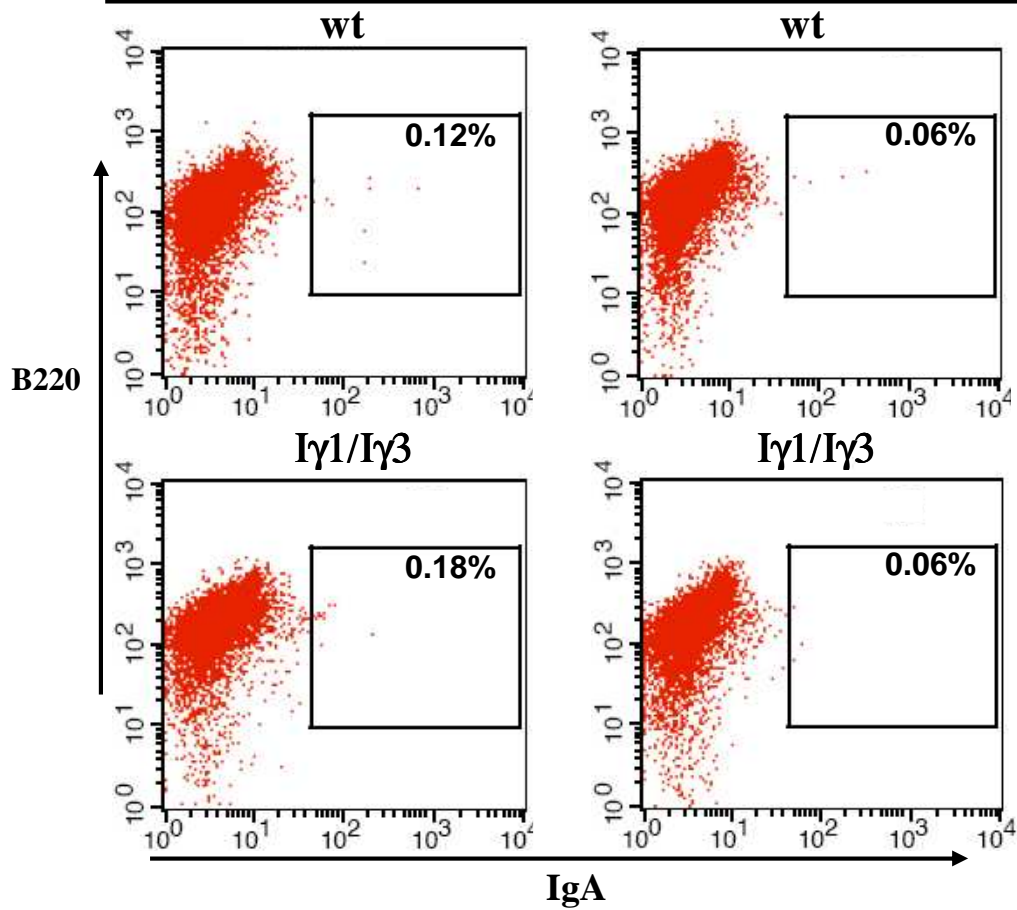

**E**

**LPS + TGF- $\beta$**

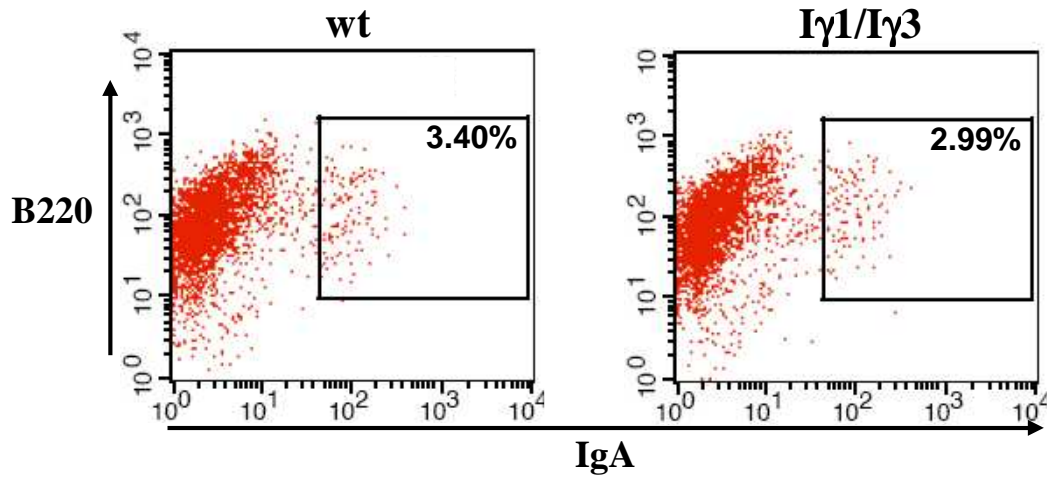

Supplement: supp_0608364104_08364Fig8.pdf [file supp_0608364104_08364Fig8.pdf]
